# Supplementary material
Source: publisher site journal article supplement (https://www.dovepress.com/article/supplementary_file/616727/616727%20Revised%20Supplementary%20Material.docx)
Supplement: Supplementary file 1 [file 616727%20Revised%20Supplementary%20Material.docx]

Supplementary Table 1 Responses to individual statements in the C-LMQ-3 and 8 domains score (n = 231)

| Statements /domains | Agree/ Strongly Agree N (%) | Neutral opinion N  (%) | Disagree/ Strongly Disagree N (%) |
| --- | --- | --- | --- |
| **Concerns about medicine use (7 items; Mean (SD) = 19.76(3.14)** |  |  |  |
| I worry that I have to take several medicines at the same time* | 80 (34.63) | 42 (18.18) | 109 (47.19) |
| I would like more say in the brands of medicines I use* | 64 (27.71) | 56 (24.24) | 111 (48.05) |
| I feel I need more information about my medicines* | 91 (39.39) | 54 (23.38) | 86 (37.23) |
| I am concerned about possible damaging long-term effects of taking medicines* | 85 (36.80) | 38 (16.45) | 108 (46.75) |
| I am concerned that I am too reliant on my medicines* | 72 (31.17) | 33 (14.29) | 126 (54.55) |
| I worry that my medicines may interact with each other* | 71 (30.74) | 38 (16.45) | 122 (52.81) |
| I am concerned that my medicines interact with eating habits (other food, alcohol, drinks, etc.)* | 62 (26.84) | 41 (17.75) | 128 (55.41) |
| **Practical difficulties (6 items; Mean (SD) = 17.91(2.46)** |  |  |  |
| I find getting my prescriptions from the doctor difficult* | 65 (28.14) | 45 (19.48) | 121 (52.38) |
| I am comfortable with the times I should take my medicines | 122 (52.81) | 38 (16.45) | 71 (30.74) |
| I am concerned that I may forget to take my medicines* | 93 (40.26) | 63 (27.27) | 75 (32.46.) |
| I find using my medicines difficult (e.g.: taking the medication from the package, keeping in mind the precautions for medication use, etc.) | 71 (30.74) | 44 (19.05) | 116 (50.22) |
| It is easy to keep my medicines routine | 130 (56.28) | 36 (15.58) | 65 (28.14) |
| I have to put a lot of planning and thought into taking my medicines* | 82 (35.50) | 54 (23.38) | 95 (41.13) |
| **Communication/relationships with HCPs (5 items; Mean (SD) = 14.76(3.12)** |  |  |  |
| I trust the judgement of my doctor(s) in choosing medicines for me | 120 (51.95) | 66 (28.57) | 45 (19.48) |
| My doctor(s) listen to my opinions about my medicines | 103 (44.59) | 66 (28.57) | 62 (26.84) |
| My doctor takes my concerns about side effects seriously | 86 (37.23) | 80 (34.63) | 65 (28.14) |
| I get enough information about my medicines from my doctor(s) | 110 (47.62) | 56 (24.24) | 65 (28.14) |
| The health professionals providing my care know enough about me and my medicines | 108 (46.75) | 53 (22.94) | 70 (30.30) |
| **Lack of effectiveness (5 items; Mean (SD) = 15.56(3.40)** |  |  |  |
| My medicines prevent my condition getting worse | 120 (52.00) | 56(24.2) | 55 (23.80) |
| My medicines live up to my expectations | 60 (25.97) | 82(35.50) | 89 (38.53) |
| My medicines allow me to live my life as I want | 60 (25.97) | 78(33.77) | 93 (40.26) |
| My medicines are working | 85 (36.80) | 58(25.10) | 88 (38.10) |
| The side effects are worth it for the benefits I get from my medicines* | 81 (35.06) | 80(34.63) | 70(30.30) |
| **Interference to day-to-day life (6 items; Mean (SD) = 14.23(3.67)** |  |  |  |
| My medicines interfere with my social or leisure activities* | 59 (25.5) | 80(34.6) | 92 (39.8) |
| My medicines interfere with my sexual life* | 53 (22.9) | 94 (40.6) | 84 (36.3) |
| Taking medicines affects my going out (walking, Cycling, driving, etc.)* | 54 (23.4) | 72 (31.1) | 105 (45.4) |
| My medicines interfere with my social relationships with (family, friends, colleagues)* | 44 (19.0) | 80(34.6) | 107 (46.3) |
| Taking medicines causes problems with daily tasks* | 54 (23.4) | 71 (30.7) | 106 (45.9) |
| My life revolves around using medicines* | 106 (45.89) | 49 (21.21) | 76 (32.90) |
| **Side-effect-burden (4 items; Mean (SD) = 10.32(2.38)** |  |  |  |
| The side effects I get are sometimes worse than the problems for which I take my medicines* | 56 (11.26) | 52 (22.51) | 153 (66.23) |
| The side effects that I get from my medicines interfere with my day to day life* | 27 (11.69) | 48 (20.78) | 156 (67.53) |
| The side effects I get from my medicines are bothersome* | 34 (14.72) | 52 (22.51) | 145 (62.77) |
| The side effects I get from my medicines adversely affect my wellbeing* | 36 (15.58) | 35 (15.15) | 160 (69.26) |
| **Autonomy/control (3 items; Mean (SD) = 9.63(1.97)** |  |  |  |
| I can vary the dose of the medicines I take | 42 (18.18) | 87 (37.66) | 102 (44.16) |
| I can choose whether or not to take my medicines | 47 (20.35) | 89 (38.53) | 95 (41.13) |
| I can vary the times I take my medicines | 53 (22.94) | 82 (35.50) | 96 (41.56) |
| **Cost-related burden (3 items; Mean (SD) = 9.16(2.47)** |  |  |  |
| I worry about paying for my medicines* | 105 (45.45) | 71 (30.7) | 55 (23.80) |
| I sometimes have to choose between buying basic essentials or medicines* | 65(28.14) | 70(30.30) | 96 (41.56) |
| I have to pay more than I can afford for my medicines* | 58 (25.1) | 60 (25.9) | 113 (48.9) |

note:* indicates items that were reverse-scored. Items marked with * were reverse-coded before summation.
